# Supplementary material for: A high rate and stable electrode consisting of a Na3V2O2X(PO4)2F3−2X–rGO composite with a cellulose binder for sodium-ion batteries
Source: Royal Society of Chemistry journal article supplement (doi:10.1039/c7ra01047h), 2017-01-01
Supplement: c7ra01047h1.pdf [file c7ra01047h1.pdf]

## Electronic Supplementary Information

### A high rate and stable electrode of the $\text{Na}_3\text{V}_2\text{O}_2\text{x}(\text{PO}_4)_2\text{F}_{3-2\text{x}}$ -rGO composite with cellulose binder for Sodium-ion batteries†

P. Ramesh Kumar<sup>a</sup>, Young Hwa Jung<sup>b</sup>, Syed Abdul Ahad<sup>a</sup> and Do Kyung Kim<sup>a\*</sup>

<sup>a</sup> Department of Materials Science and Engineering, Korea Advanced Institute of Science and Technology (KAIST), 291 Daehak-ro, Yuseong-gu, Daejeon 305-701, Republic of Korea

<sup>b</sup> Beamline Department, Pohang Accelerator Laboratory (PAL), Pohang 37673, Republic of Korea

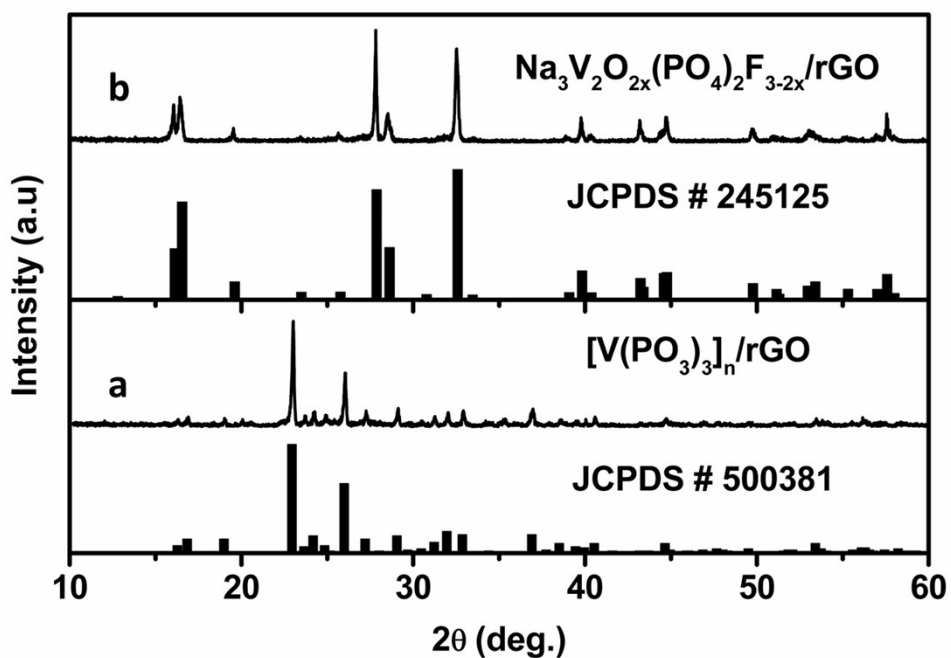

Figure S1: powder XRD patterns for the  $[\text{V}(\text{PO}_3)_3]_n$ -rGO and NVOPF-rGO composites along with their JCPDS data

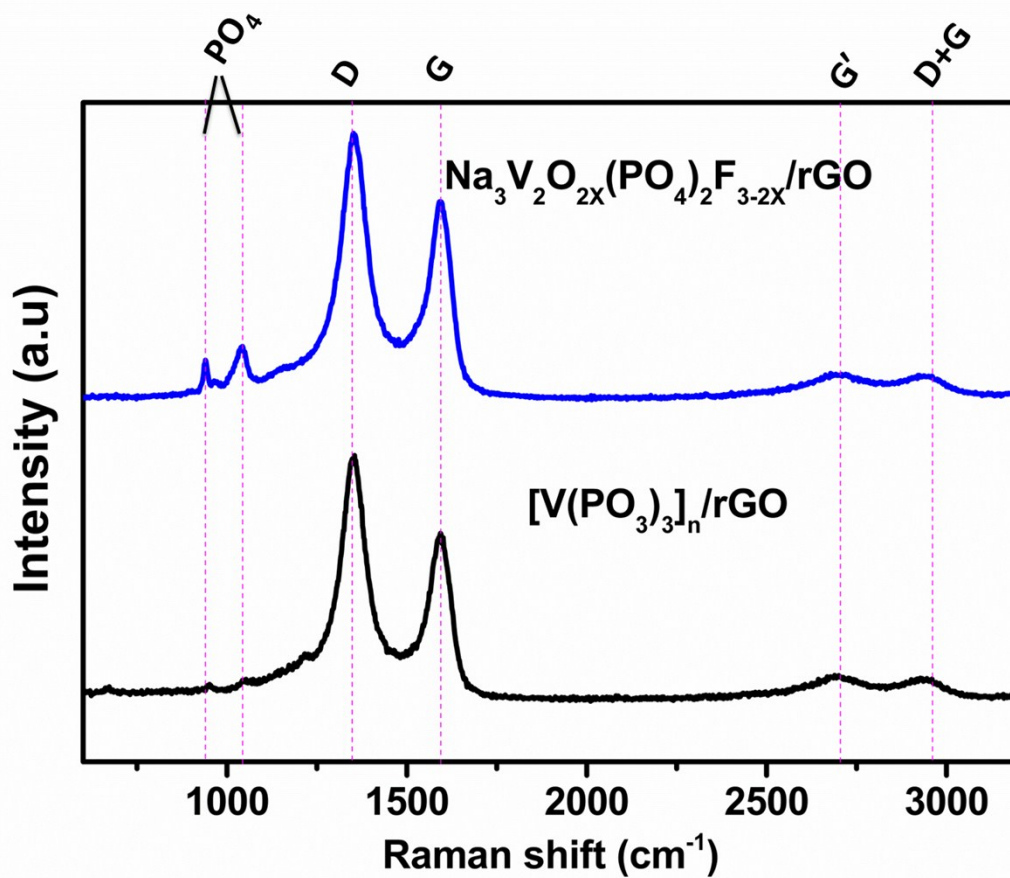

**Figure S2:** Raman spectra for both  $[\text{V}(\text{PO}_3)_3]_n\text{-rGO}$  and the  $\text{Na}_3\text{V}_2\text{O}_{2x}(\text{PO}_4)_2\text{F}_{3-2x}\text{-rGO}$  composites

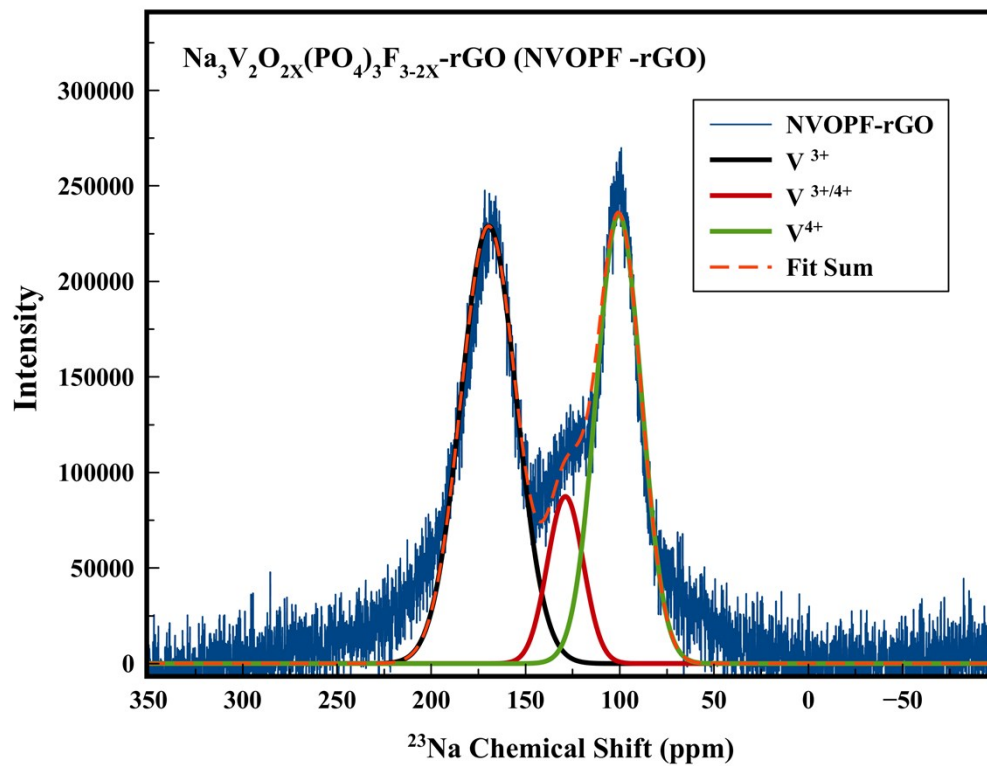

**Figure S3:**  $^{23}\text{Na}$  solid-state NMR spectrum of the  $\text{Na}_3\text{V}_2\text{O}_{2x}(\text{PO}_4)_2\text{F}_{3-2x}\text{-rGO}$  composite

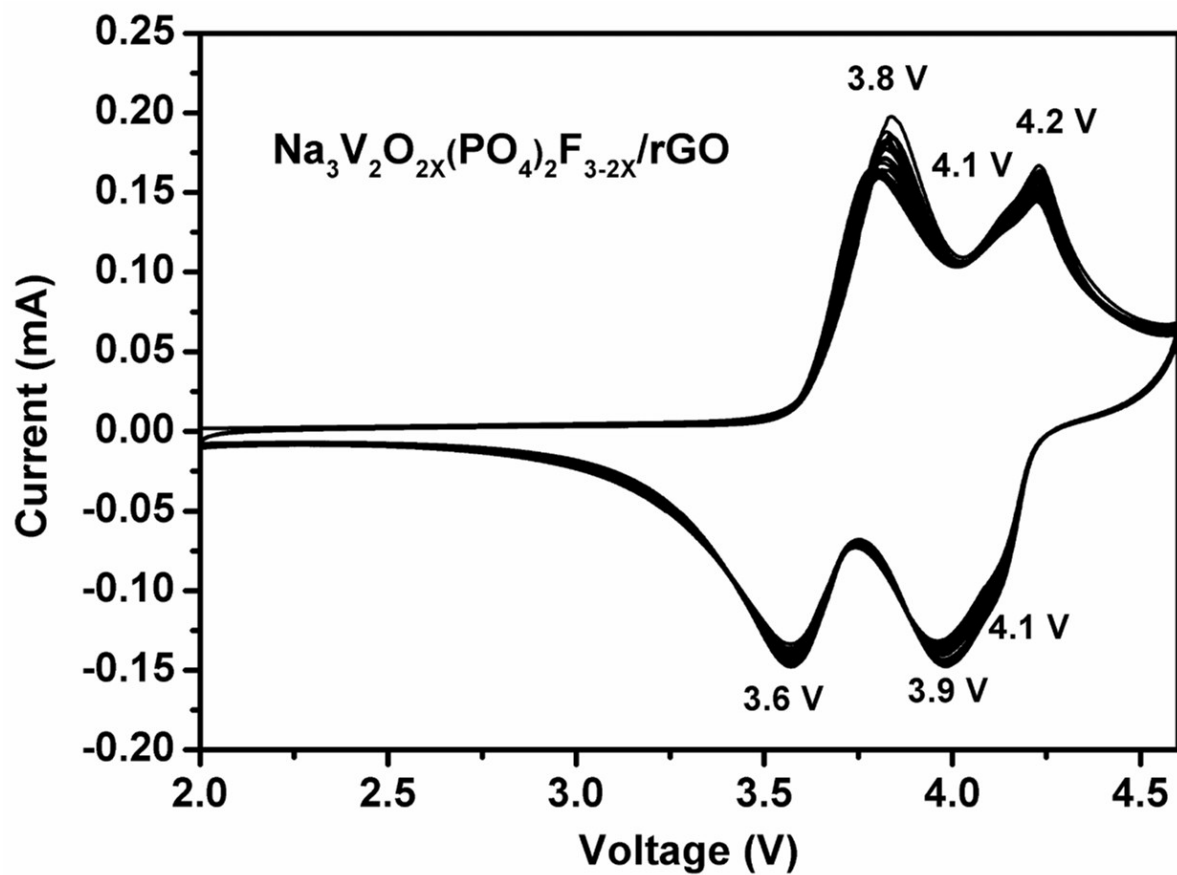

Figure S4: CV plot for the  $\text{Na}_3\text{V}_2\text{O}_{2x}(\text{PO}_4)_2\text{F}_{3-2x}/\text{rGO}$  composite with PVDF binder.

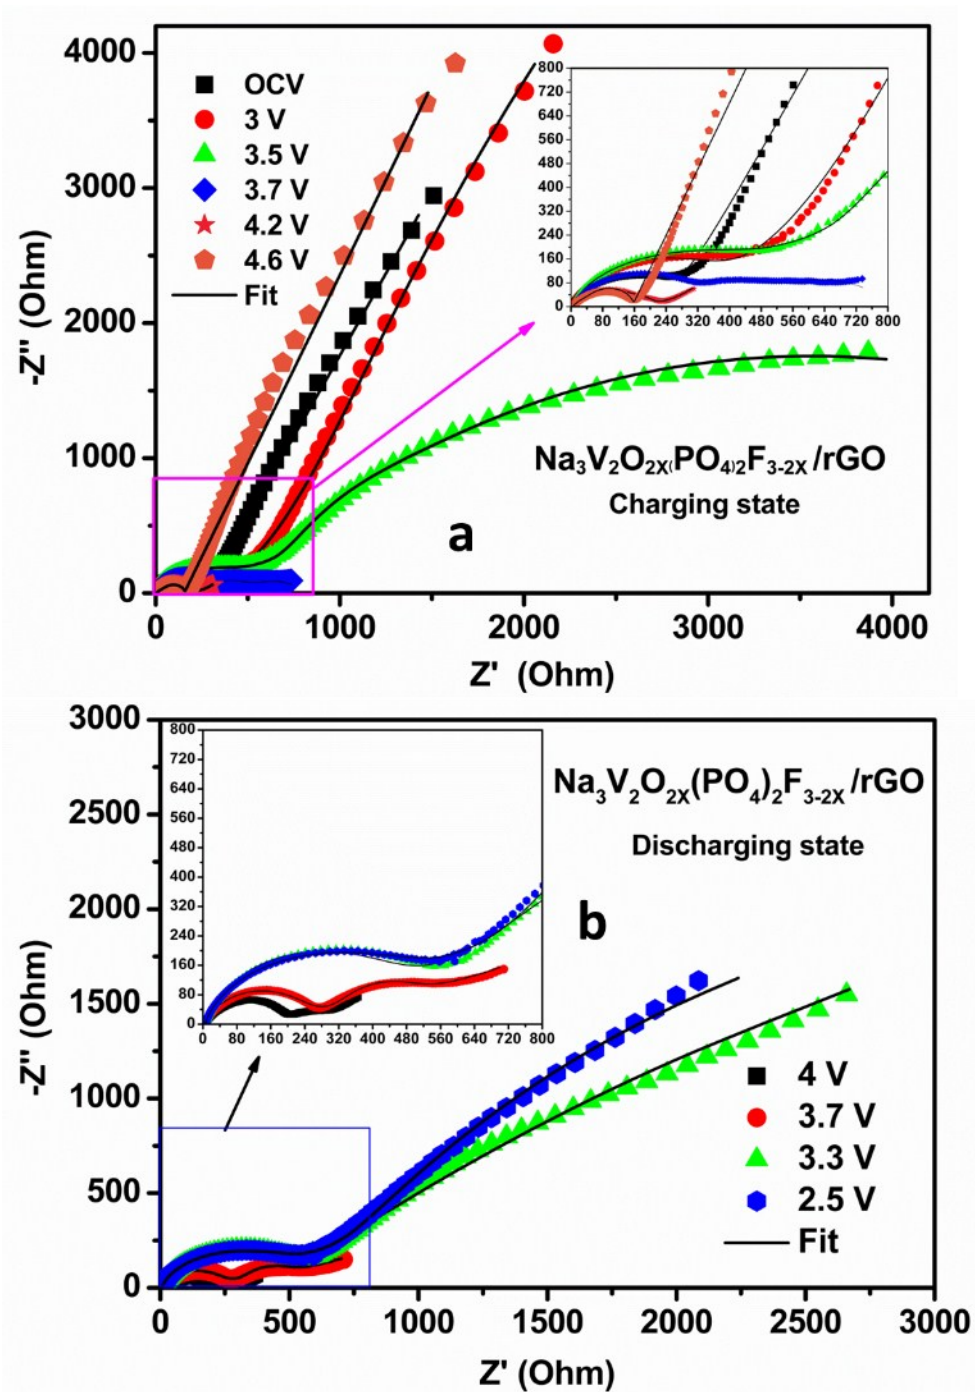

**Figure S5:** Nyquist plots for the  $\text{Na}_3\text{V}_2\text{O}_{2x}(\text{PO}_4)_2\text{F}_{3-2x}/\text{rGO}$  composite with CMC binder electrode during (a) charging and (b) discharging states.

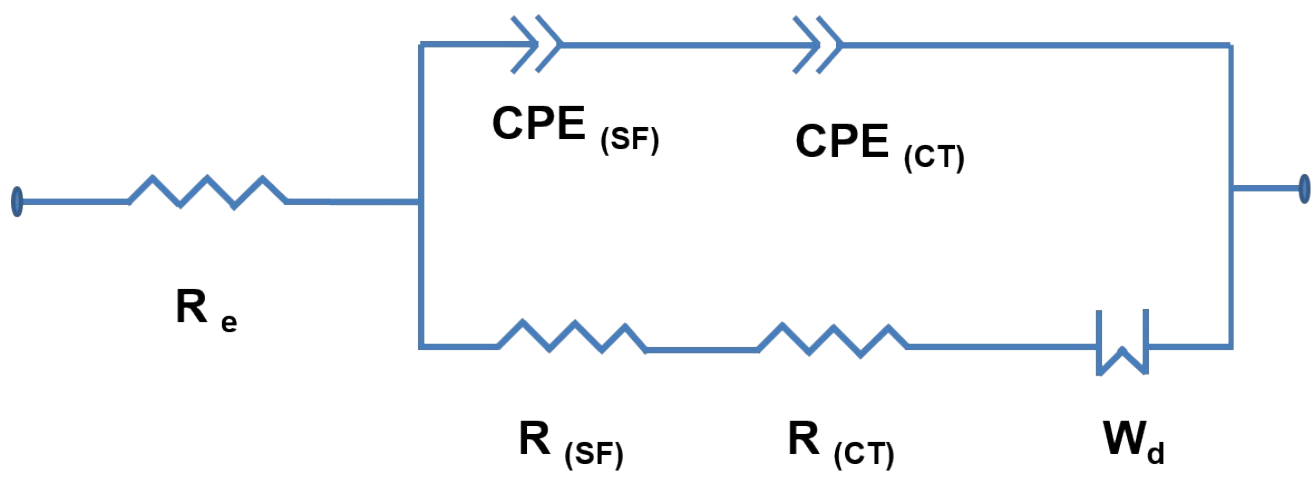

**Figure S6:** Electrical equivalent circuit consisting of resistors and constant phase elements for  $\text{Na}_3\text{V}_2\text{O}_{2x}(\text{PO}_4)_2\text{F}_{3-2x}/\text{rGO}$  composite electrode.

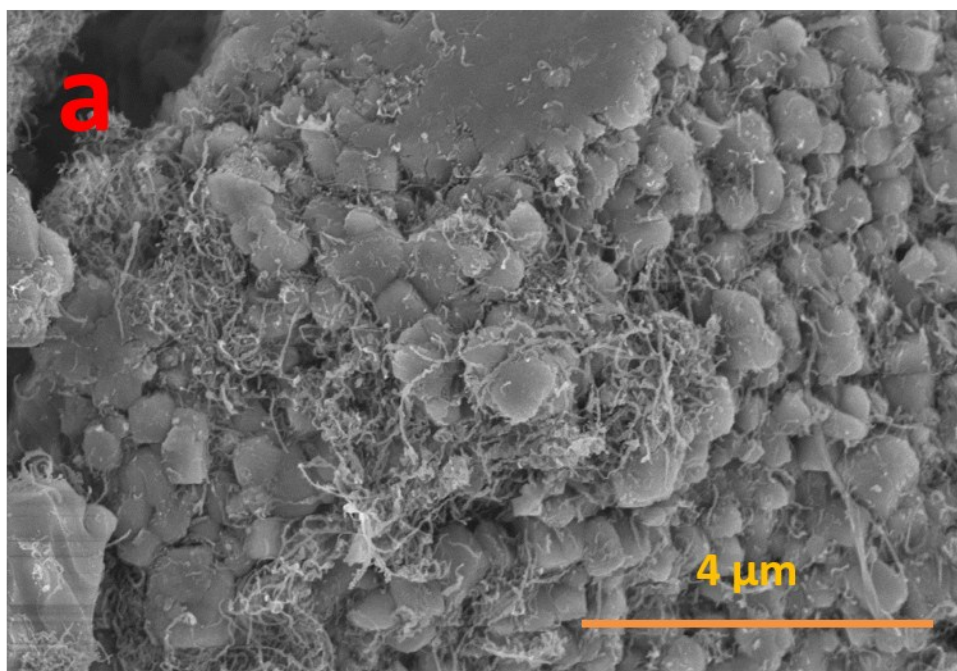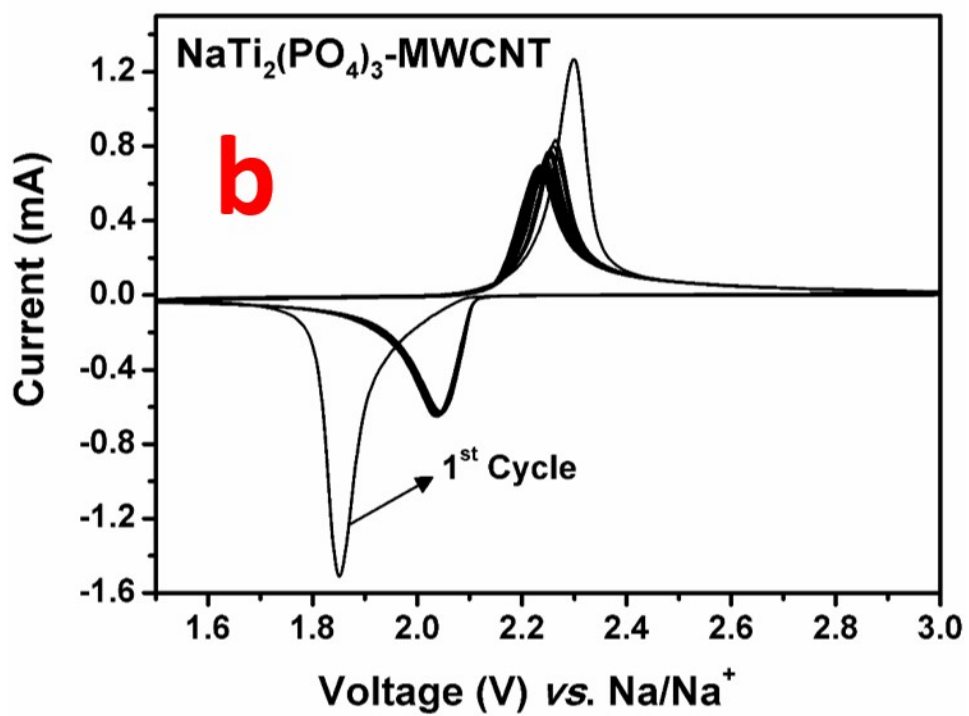

**Figure S7:** a) SEM image and b) Cyclic voltammetry plot of the NaTi<sub>2</sub>(PO<sub>4</sub>)<sub>3</sub>-MWCNT versus Na/Na<sup>+</sup>.
